# Supplementary material for: Sequential solvent casting for improving the structural ordering and electrical characteristics of polythiophene thin films
Source: Royal Society of Chemistry journal article supplement (doi:10.1039/c4ra06311b), 2014-01-01
Supplement: c4ra06311b1.pdf [file c4ra06311b1.pdf]

## Supplementary material

# Sequential Solvent Casting for Improving the Structural Ordering and Electrical Characteristics of Polythiophene Thin Films

Shinae Kim, Boseok Kang, Minjung Lee, Seung Goo Lee<sup>d</sup>, Kilwon Cho, Hoichang Yang\*,  
Yeong Don Park\*

<sup>a</sup> Department of Energy and Chemical Engineering, Incheon National University, Incheon 406-772, Korea

<sup>b</sup> Department of Chemical Engineering, Pohang University of Science and Technology, Pohang 790-784, Korea

<sup>c</sup> Department of Advanced Fiber Engineering, Optoelectronic Hybrids Research Center, Inha University, Incheon, 402-751, Korea

<sup>d</sup> Department of Chemical Engineering, Massachusetts Institute of Technology, Cambridge, Massachusetts 02139, USA

<sup>†</sup> S. K. and B. K. contributed equally to this work.

\* Corresponding author. Tel: +82-32-835-8679

E-mail address: [hcyang@inha.ac.kr](mailto:hcyang@inha.ac.kr) (H. Yang), [ydpark@incheon.ac.kr](mailto:ydpark@incheon.ac.kr) (Y. D. Park)

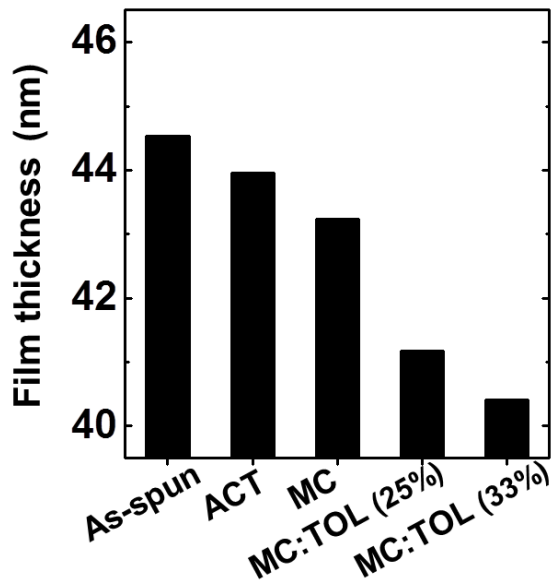

**Figure S1.** Thickness values of the P3HT films: as-spun or exposed to the various solvents.

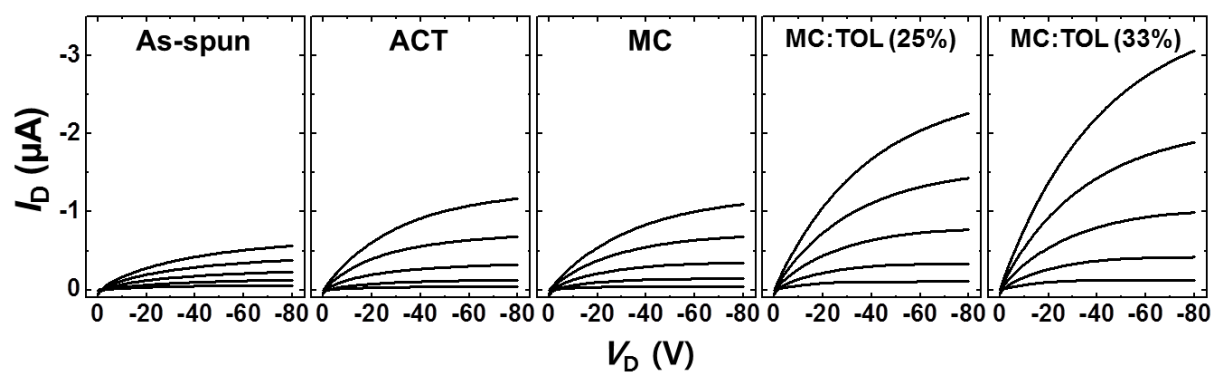

**Figure S2.** Output characteristics ( $I_D$ - $V_D$ ) of FETs ( $V_G$  steps: 0, -20, -40, -60, -80 V) fabricated using the P3HT thin films exposed to the various solvents.

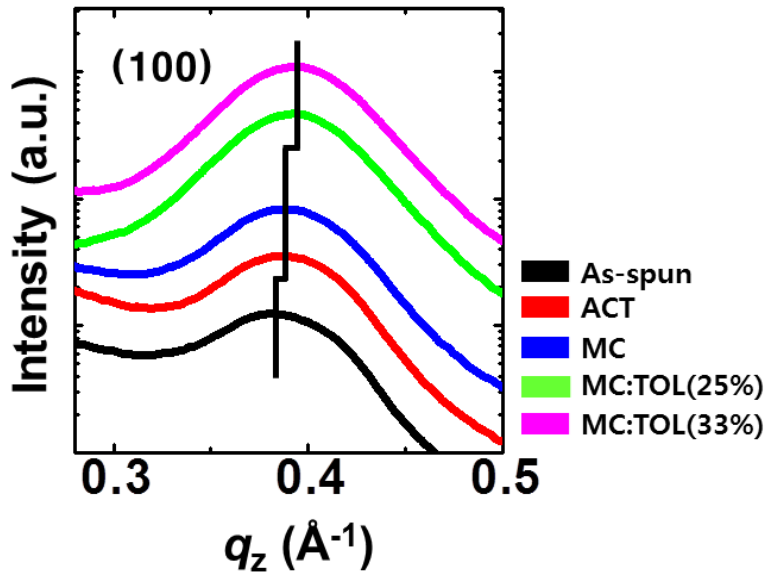

Figure S3. Magnified X-ray intensity profiles of the out-of-plan (100) reflections.
